# Supplementary material for: Quantitative Brain MRI Metrics Distinguish Four Different ALS Phenotypes: A Machine Learning Based Study
Source: MDPI journal article supplement (doi:10.3390/diagnostics13091521), 2023-04-24
Supplement: s1 [file s1]

## Supplementary Materials

**Supplementary Table S1** - Mean assortativity values of the control group and ALS subgroups

| <b>Patient Group/Graph Measure</b> | <b>Control</b> | <b>ALS-CST+</b> | <b>ALS-CST–</b> | <b>ALS-CI</b> | <b>ALS-FTD</b> |
|------------------------------------|----------------|-----------------|-----------------|---------------|----------------|
| Assortativity Value from AD Graph  | 0.12           | 0.17            | 0.04            | 0.10          | –0.04          |
| Assortativity Value from RD Graph  | 0.07           | 0.05            | 0.06            | 0.05          | 0.05           |

*Abbreviations used in Supplementary Table S1:*

ALS-CI - Classic ALS patients, ALS-CST+ - UMN-predominant ALS patients with CST hyperintensity, ALS-CST– - UMN-predominant ALS patients without CST hyperintensity, ALS-FTD - ALS patients with frontotemporal dementia, AD - Axial diffusivity, RD - Radial diffusivity.

**Supplementary Table S2** – Mean graph measure values in the control group and UMN-predominant ALS subgroups

| <b>Patient Group/DTI network metric</b> | <b>Graph Measure</b>              | <b>Controls</b> | <b>ALS-CST+</b> | <b>ALS-CST–</b> |
|-----------------------------------------|-----------------------------------|-----------------|-----------------|-----------------|
| FA                                      | Transitivity                      | 0.53            | 0.53            | 0.59            |
|                                         | Characteristic path length        | 2.40            | 2.53            | 2.27            |
| MD                                      | Mean degree value                 | 7.83            | 5.93            | 3.97            |
|                                         | Normalized clustering coefficient | 3.34            | 2.96            | 2.51            |
| RD                                      | Normalized path length            | 1.17            | 1.14            | 1.21            |

*Abbreviations used in Supplementary Table S2:*

ALS-CST+ - UMN-predominant ALS patients with CST hyperintensity, ALS-CST– - UMN-predominant ALS patients without CST hyperintensity, DTI - Diffusion tensor imaging, FA - Fractional anisotropy, MD - Mean diffusivity, RD - Radial diffusivity.

**Supplementary Table S3** - Mean DTI metrics along the CST in the control group and UMN-predominant ALS subgroups

| <b>Patient Group/DTI network metrics</b> | <b>ROI location along CST</b> | <b>Controls</b>         | <b>ALS-CST+</b>         | <b>ALS-CST–</b>         |
|------------------------------------------|-------------------------------|-------------------------|-------------------------|-------------------------|
| AD (mm <sup>2</sup> /sec)                | Right CP                      | 1.64 x 10 <sup>-3</sup> | 1.78 x 10 <sup>-3</sup> | 1.89 x 10 <sup>-3</sup> |
|                                          | Right CSoLV                   | 1.10 x 10 <sup>-3</sup> | 1.09 x 10 <sup>-3</sup> | 1.16 x 10 <sup>-3</sup> |
| RD (mm <sup>2</sup> /sec)                | Right CP                      | 0.49 x 10 <sup>-3</sup> | 0.76 x 10 <sup>-3</sup> | 0.86 x 10 <sup>-3</sup> |
|                                          | Right PLIC                    | 0.36 x 10 <sup>-3</sup> | 0.54 x 10 <sup>-3</sup> | 1.33 x 10 <sup>-3</sup> |
|                                          | Right CSoLV                   | 0.5 x 10 <sup>-3</sup>  | 0.6 x 10 <sup>-3</sup>  | 0.6 x 10 <sup>-3</sup>  |
|                                          | Right subPMC                  | 0.52 x 10 <sup>-3</sup> | 0.34 x 10 <sup>-3</sup> | 0.64 x 10 <sup>-3</sup> |
| MD (mm <sup>2</sup> /sec)                | Right CP                      | 0.87 x 10 <sup>-3</sup> | 0.88 x 10 <sup>-3</sup> | 0.92 x 10 <sup>-3</sup> |
|                                          | Left CP                       | 1.10 x 10 <sup>-3</sup> | 0.90 x 10 <sup>-3</sup> | 0.90 x 10 <sup>-3</sup> |

*Abbreviations used in Supplementary Table S3:*

ALS-CST+ - UMN-predominant ALS patients with CST hyperintensity, ALS-CST– - UMN-predominant ALS patients without CST hyperintensity, AD - Axial diffusivity, CP - Cerebral peduncle, CST - corticospinal tract, DTI - Diffusion tensor imaging, FA - Fractional anisotropy, MD - Mean diffusivity, PLIC - Posterior limb of internal capsule, RD - Radial diffusivity, ROI - Region of interest, subPMC - Subcortical to primary motor cortex, CSoLV—Centrum semiovale at top of lateral ventricle.

**Supplementary Table S4** - Clinical measures influencing classification of UMN-predominant ALS subgroups

| <b>Patient Group/Clinical Measures</b>  | <b>ALS-CST+</b> | <b>ALS-CST–</b> |
|-----------------------------------------|-----------------|-----------------|
| Symptom duration (mos)                  | 14.3            | 59.3            |
| El Escorial criteria                    | 1.37            | 1.81            |
| Bulbar component of ALSFRS-R score      | 10.06           | 9.47            |
| Lumbosacral component of ALSFRS-R score | 6.13            | 6.79            |

*Abbreviations used in Supplementary Table S4:*

ALS-CST+ - UMN-predominant ALS patients with CST hyperintensity, ALS-CST– - UMN-predominant ALS patients without CST hyperintensity, ALSFRS-R - Revised ALS functional rating scale, mos - months.

**Supplementary Table S5** – Mean graph measure values in controls, and patients with classic ALS and ALS-FTD

| <b>Patient Group/DTI network metric</b> | <b>Graph Measure</b>        | <b>Controls</b> | <b>ALS-CI</b> | <b>ALS-FTD</b> |
|-----------------------------------------|-----------------------------|-----------------|---------------|----------------|
| AD                                      | Network density             | 0.07            | 0.06          | 0.03           |
|                                         | Mean local efficiency       | 0.59            | 0.55          | 0.29           |
|                                         | Mean edge betweenness       | 1.30            | 1.16          | 0.50           |
| MD                                      | Network density             | 0.07            | 0.06          | 0.03           |
|                                         | Mean clustering coefficient | 0.49            | 0.46          | 0.25           |
|                                         | Mean local efficiency       | 0.60            | 0.56          | 0.30           |

*Abbreviations used in Supplementary Table S5:*

ALS-CI - Classic ALS patients, ALS-FTD - ALS patients with frontotemporal dementia, AD - Axial diffusivity, DTI - Diffusion tensor imaging, MD - Mean diffusivity.

**Supplementary Table S6** – Mean DTI metrics along the CST in controls, and patients with classic ALS and ALS-FTD

| <b>Patient Group/DTI measures along CST</b> | <b>ROI along CST</b> | <b>Controls</b>         | <b>ALS-CI</b>           | <b>ALS-FTD</b>          |
|---------------------------------------------|----------------------|-------------------------|-------------------------|-------------------------|
| FA                                          | Left PLIC            | 0.76                    | 0.72                    | 0.70                    |
|                                             | Left CSoLV           | 0.51                    | 0.46                    | 0.46                    |
|                                             | Left SubPMC          | 0.66                    | 0.54                    | 0.56                    |
| AD (mm <sup>2</sup> /sec)                   | Right CP             | 1.60 x 10 <sup>-3</sup> | 1.90 x 10 <sup>-3</sup> | 2.0 x 10 <sup>-3</sup>  |
|                                             | Right PLIC           | 1.50 x 10 <sup>-3</sup> | 1.50 x 10 <sup>-3</sup> | 1.70 x 10 <sup>-3</sup> |
| RD (mm <sup>2</sup> /sec)                   | Right CP             | 0.49 x 10 <sup>-3</sup> | 0.80 x 10 <sup>-3</sup> | 0.98 x 10 <sup>-3</sup> |
|                                             | Right PLIC           | 0.36 x 10 <sup>-3</sup> | 0.49 x 10 <sup>-3</sup> | 1.11 x 10 <sup>-3</sup> |
|                                             | Right CSoLV          | 0.50 x 10 <sup>-3</sup> | 0.60 x 10 <sup>-3</sup> | 0.60 x 10 <sup>-3</sup> |
|                                             | Right subPMC         | 0.52 x 10 <sup>-3</sup> | 0.60 x 10 <sup>-3</sup> | 0.68 x 10 <sup>-3</sup> |
| MD (mm <sup>2</sup> /sec)                   | Right CP             | 0.87 x 10 <sup>-3</sup> | 0.86 x 10 <sup>-3</sup> | 0.94 x 10 <sup>-3</sup> |
|                                             | Left CP              | 1.10 x 10 <sup>-3</sup> | 0.95 x 10 <sup>-3</sup> | 0.91 x 10 <sup>-3</sup> |
|                                             | Left subPMC          | 0.90 x 10 <sup>-3</sup> | 0.73 x 10 <sup>-3</sup> | 0.69 x 10 <sup>-3</sup> |

*Abbreviations used in Supplementary Table S6:*

ALS-CI - Classic ALS patients, ALS-FTD - ALS patients with frontotemporal dementia, AD - Axial diffusivity, CP - Cerebral peduncle, CST - corticospinal tract, DTI - Diffusion tensor imaging, FA - Fractional anisotropy, MD - Mean diffusivity, PLIC - Posterior limb of internal capsule, RD - Radial diffusivity, ROI - Region of interest, subPMC - Subcortical to primary motor cortex, CSoLV—Centrum semiovale at top of lateral ventricle.

**Supplementary Table S7** - Mean FD attributes influencing classification of controls and patients with classic ALS and ALS-FTD

| <b>Patient Group/FD measures</b> | <b>Controls</b> | <b>ALS-CI</b> | <b>ALS-FTD</b> |
|----------------------------------|-----------------|---------------|----------------|
| (FD_WM_skel_W)                   | 2.49            | 2.48          | 2.47           |
| (FD_GM_Gen_R)                    | 2.56            | 2.57          | 2.57           |
| (FD_GM_skel_L)                   | 2.47            | 2.47          | 2.48           |
| (FD_GM_skel_R)                   | 2.48            | 2.48          | 2.49           |
| (FD_GM_skel_W)                   | 2.55            | 2.56          | 2.56           |

*Abbreviations used in Supplementary Table S7:*

ALS-CI - Classic ALS patients, ALS-FTD - ALS patients with frontotemporal dementia, FD - Fractal dimension, Gen - Brain general structure, GM - Gray matter, Left and L - Left hemisphere, R, Right - Right hemisphere, Skel - Skeleton of the brain, WM - White matter, W - Whole brain.

**Supplementary Table S8** - Clinical measures influencing classification of patients with classic ALS and ALS-FTD

| <b>Patient Group/Clinical Measures</b> | <b>ALS-CI</b> | <b>ALS-FTD</b> |
|----------------------------------------|---------------|----------------|
| Symptom duration (mos)                 | 29.1          | 35.1           |
| El Escorial criteria score             | 2.48          | 2.41           |
| ALSFRS-R score                         | 37.2          | 30.5           |

*Abbreviations used in Supplementary Table S8:*

ALS-CI - Classic ALS patients, ALS-FTD - ALS patients with frontotemporal dementia,

ALSFRS-R - Revised ALS functional rating scale, mos - months.
